# Supplementary material
Source: MDPI journal article supplement (https://www.mdpi.com/2073-4352/2/1/118)
Supplement: s1 [file s1]

 
data_s280 
 
_audit_creation_method            SHELXL-97 
_chemical_name_systematic 
; 
 ? 
; 
_chemical_name_common             ? 
_chemical_melting_point           ? 
_chemical_formula_moiety          ? 
_chemical_formula_sum 
 'C6 H10 B F4 N5 O2 S' 
_chemical_formula_weight          303.06 
 
loop_ 
 _atom_type_symbol 
 _atom_type_description 
 _atom_type_scat_dispersion_real 
 _atom_type_scat_dispersion_imag 
 _atom_type_scat_source 
 'C'  'C'   0.0033   0.0016 
 'International Tables Vol C Tables 4.2.6.8 and 6.1.1.4' 
 'H'  'H'   0.0000   0.0000 
 'International Tables Vol C Tables 4.2.6.8 and 6.1.1.4' 
 'B'  'B'   0.0013   0.0007 
 'International Tables Vol C Tables 4.2.6.8 and 6.1.1.4' 
 'N'  'N'   0.0061   0.0033 
 'International Tables Vol C Tables 4.2.6.8 and 6.1.1.4' 
 'O'  'O'   0.0106   0.0060 
 'International Tables Vol C Tables 4.2.6.8 and 6.1.1.4' 
 'F'  'F'   0.0171   0.0103 
 'International Tables Vol C Tables 4.2.6.8 and 6.1.1.4' 
 'S'  'S'   0.1246   0.1234 
 'International Tables Vol C Tables 4.2.6.8 and 6.1.1.4' 
 
_symmetry_cell_setting            orthorhombic 
_symmetry_space_group_name_H-M    Fdd2 
 
loop_ 
 _symmetry_equiv_pos_as_xyz 
 'x, y, z' 
 '-x, -y, z' 
 'x+1/4, -y+1/4, z+1/4' 
 '-x+1/4, y+1/4, z+1/4' 
 'x, y+1/2, z+1/2' 
 '-x, -y+1/2, z+1/2' 
 'x+1/4, -y+3/4, z+3/4' 
 '-x+1/4, y+3/4, z+3/4' 
 'x+1/2, y, z+1/2' 
 '-x+1/2, -y, z+1/2' 
 'x+3/4, -y+1/4, z+3/4' 
 '-x+3/4, y+1/4, z+3/4' 
 'x+1/2, y+1/2, z' 
 '-x+1/2, -y+1/2, z' 
 'x+3/4, -y+3/4, z+1/4' 
 '-x+3/4, y+3/4, z+1/4' 
 
_cell_length_a                    24.375(1) 
_cell_length_b                    30.163(2) 
_cell_length_c                    13.653(1) 
_cell_angle_alpha                 90.00 
_cell_angle_beta                  90.00 
_cell_angle_gamma                 90.00 
_cell_volume                      10038.0(11) 
_cell_formula_units_Z             32 
_cell_measurement_temperature     233(2) 
_cell_measurement_reflns_used     11852 
_cell_measurement_theta_min       1.0 
_cell_measurement_theta_max       23.0 
 
_exptl_crystal_description        plate 
_exptl_crystal_colour             colorless 
_exptl_crystal_size_max           0.15 
_exptl_crystal_size_mid           0.10 
_exptl_crystal_size_min           0.03 
_exptl_crystal_density_meas       ? 
_exptl_crystal_density_diffrn     1.604 
_exptl_crystal_density_method     'not measured' 
_exptl_crystal_F_000              4928 
_exptl_absorpt_coefficient_mu     0.313 
_exptl_absorpt_correction_type    none 
_exptl_absorpt_correction_T_min   ? 
_exptl_absorpt_correction_T_max   ? 
_exptl_absorpt_process_details    ? 
 
_exptl_special_details 
; 
 ? 
; 
 
_diffrn_ambient_temperature       233(2) 
_diffrn_radiation_wavelength      0.71073 
_diffrn_radiation_type            MoK\a 
_diffrn_radiation_source          'fine-focus sealed tube' 
_diffrn_radiation_monochromator   graphite 
_diffrn_measurement_device_type   'Nonius KappaCCD' 
_diffrn_measurement_method        'phi- and omega-scans' 
_diffrn_detector_area_resol_mean  ? 
_diffrn_standards_number          0 
_diffrn_standards_interval_count  ? 
_diffrn_standards_interval_time   ? 
_diffrn_standards_decay_%         ? 
_diffrn_reflns_number             9666 
_diffrn_reflns_av_R_equivalents   0.0733 
_diffrn_reflns_av_sigmaI/netI     0.0587 
_diffrn_reflns_limit_h_min        -24 
_diffrn_reflns_limit_h_max        24 
_diffrn_reflns_limit_k_min        -29 
_diffrn_reflns_limit_k_max        30 
_diffrn_reflns_limit_l_min        -13 
_diffrn_reflns_limit_l_max        13 
_diffrn_reflns_theta_min          1.84 
_diffrn_reflns_theta_max          21.00 
_reflns_number_total              2699 
_reflns_number_gt                 2010 
_reflns_threshold_expression      >2sigma(I) 
 
_computing_data_collection        COLLECT 
_computing_cell_refinement        ? 
_computing_data_reduction         'DENZO and SCALEPACK' 
_computing_structure_solution     'SHELXS-97 (Sheldrick, 1990)' 
_computing_structure_refinement   'SHELXL-97 (Sheldrick, 1997)' 
_computing_molecular_graphics     ? 
_computing_publication_material   ? 
 
_refine_special_details 
; 
 Small crystal with low diffraction, only reflections until 2theta of 44
 degrees were used. Two molecules in the asymmetric unit. One  BF4-anion,
 on a general position, is disordered with a refined ratio (use of free
 varible) of  2:1 for the flurine atoms F1-F4 and F1A-F4A. The borone atoms
 of the  the other anions lie on a twofold rotation axis, B2 and B3.
;
 
_refine_ls_structure_factor_coef  Fsqd  
_refine_ls_matrix_type            full 
_refine_ls_weighting_scheme       calc  
_refine_ls_weighting_details 
 'calc w=1/[\s^2^(Fo^2^)+(0.0901P)^2^+0.0000P] where P=(Fo^2^+2Fc^2^)/3' 
_atom_sites_solution_primary      direct 
_atom_sites_solution_secondary    difmap 
_atom_sites_solution_hydrogens    geom 
_refine_ls_hydrogen_treatment     constr 
_refine_ls_extinction_method      none 
_refine_ls_extinction_coef        ? 
_refine_ls_abs_structure_details 
 'Flack H D (1983), Acta Cryst. A39, 876-881' 
_refine_ls_abs_structure_Flack    0.16(17) 
_refine_ls_number_reflns          2699 
_refine_ls_number_parameters      383 
_refine_ls_number_restraints      1 
_refine_ls_R_factor_all           0.0818 
_refine_ls_R_factor_gt            0.0538 
_refine_ls_wR_factor_ref          0.1469 
_refine_ls_wR_factor_gt           0.1316 
_refine_ls_goodness_of_fit_ref    1.039 
_refine_ls_restrained_S_all       1.038 
_refine_ls_shift/su_max           0.025 
_refine_ls_shift/su_mean          0.001 
 
loop_ 
 _atom_site_label 
 _atom_site_type_symbol 
 _atom_site_fract_x 
 _atom_site_fract_y 
 _atom_site_fract_z 
 _atom_site_U_iso_or_equiv 
 _atom_site_adp_type 
 _atom_site_occupancy 
 _atom_site_symmetry_multiplicity 
 _atom_site_calc_flag 
 _atom_site_refinement_flags 
 _atom_site_disorder_assembly 
 _atom_site_disorder_group 
S1 S 0.17029(8) -0.11906(7) 0.24803(14) 0.0559(6) Uani 1 1 d . . . 
S2 S 0.15984(10) 0.12864(8) 0.9926(2) 0.0716(7) Uani 1 1 d . . . 
O1 O 0.2020(2) -0.10683(19) 0.3307(4) 0.0638(16) Uani 1 1 d . . . 
O2 O 0.1205(2) -0.09867(18) 0.2240(5) 0.076(2) Uani 1 1 d . . . 
O3 O 0.1849(3) 0.1457(2) 0.9086(5) 0.090(2) Uani 1 1 d . . . 
O4 O 0.1101(3) 0.1446(2) 1.0313(6) 0.102(3) Uani 1 1 d . . . 
N1 N 0.1563(2) -0.17367(18) 0.2684(4) 0.0422(15) Uani 1 1 d . . . 
N2 N 0.1289(2) -0.24057(19) 0.2478(6) 0.0498(16) Uani 1 1 d . . . 
N3 N 0.2056(3) -0.1207(2) 0.1462(5) 0.065(2) Uani 1 1 d . . . 
N4 N 0.2562(4) -0.1242(2) 0.1602(5) 0.064(2) Uani 1 1 d . . . 
N5 N 0.3019(4) -0.1272(3) 0.1638(8) 0.096(3) Uani 1 1 d . . . 
N6 N 0.1510(3) 0.0738(2) 0.9666(5) 0.0607(19) Uani 1 1 d . . . 
N7 N 0.1293(3) 0.0057(2) 0.9807(7) 0.0567(19) Uani 1 1 d . . . 
N8 N 0.1991(4) 0.1279(2) 1.0929(6) 0.077(2) Uani 1 1 d . . . 
N9 N 0.2477(4) 0.1256(2) 1.0752(6) 0.074(3) Uani 1 1 d . . . 
N10 N 0.2930(5) 0.1229(3) 1.0664(7) 0.103(3) Uani 1 1 d . . . 
C1 C 0.1256(3) -0.1998(3) 0.2091(5) 0.046(2) Uani 1 1 d . . . 
C2 C 0.1790(3) -0.1983(3) 0.3457(5) 0.054(2) Uani 1 1 d . . . 
H2 H 0.2017 -0.1881 0.3966 0.064 Uiso 1 1 calc . . . 
C3 C 0.1612(4) -0.2384(3) 0.3305(7) 0.065(2) Uani 1 1 d . . . 
H3 H 0.1694 -0.2627 0.3708 0.079 Uiso 1 1 calc . . . 
C4 C 0.0954(4) -0.1873(3) 0.1224(6) 0.063(2) Uani 1 1 d . . . 
H4A H 0.0965 -0.2120 0.0757 0.075 Uiso 1 1 calc . . . 
H4B H 0.1137 -0.1619 0.0917 0.075 Uiso 1 1 calc . . . 
C5 C 0.0352(4) -0.1751(4) 0.1423(8) 0.094(3) Uani 1 1 d . . . 
H5A H 0.0177 -0.1663 0.0816 0.142 Uiso 1 1 calc . . . 
H5B H 0.0337 -0.1508 0.1887 0.142 Uiso 1 1 calc . . . 
H5C H 0.0162 -0.2006 0.1694 0.142 Uiso 1 1 calc . . . 
C6 C 0.1035(4) -0.2802(3) 0.2060(7) 0.079(3) Uani 1 1 d . . . 
H6A H 0.0963 -0.2754 0.1369 0.119 Uiso 1 1 calc R . . 
H6B H 0.0692 -0.2862 0.2396 0.119 Uiso 1 1 calc R . . 
H6C H 0.1280 -0.3053 0.2137 0.119 Uiso 1 1 calc R . . 
C7 C 0.1256(3) 0.0441(3) 1.0238(5) 0.052(3) Uani 1 1 d . . . 
C8 C 0.1723(4) 0.0529(3) 0.8853(6) 0.061(2) Uani 1 1 d . . . 
H8 H 0.1926 0.0660 0.8344 0.073 Uiso 1 1 calc . . . 
C9 C 0.1583(3) 0.0102(3) 0.8930(7) 0.062(2) Uani 1 1 d . . . 
H9 H 0.1664 -0.0125 0.8480 0.074 Uiso 1 1 calc . . . 
C10 C 0.0959(4) 0.0511(3) 1.1211(6) 0.065(2) Uani 1 1 d . . . 
H10A H 0.0990 0.0243 1.1612 0.079 Uiso 1 1 calc . . . 
H10B H 0.1132 0.0756 1.1568 0.079 Uiso 1 1 calc . . . 
C11 C 0.0354(4) 0.0617(4) 1.1041(9) 0.107(4) Uani 1 1 d . . . 
H11A H 0.0171 0.0650 1.1667 0.161 Uiso 1 1 calc . . . 
H11B H 0.0185 0.0378 1.0674 0.161 Uiso 1 1 calc . . . 
H11C H 0.0323 0.0891 1.0674 0.161 Uiso 1 1 calc . . . 
C12 C 0.1112(4) -0.0375(3) 1.0128(8) 0.087(3) Uani 1 1 d . . . 
H12A H 0.0728 -0.0361 1.0316 0.130 Uiso 1 1 calc R . . 
H12B H 0.1330 -0.0469 1.0685 0.130 Uiso 1 1 calc R . . 
H12C H 0.1155 -0.0587 0.9598 0.130 Uiso 1 1 calc R . . 
B1 B 0.2485(5) -0.0010(4) 0.6593(10) 0.066(3) Uani 1 1 d . . . 
B2 B 0.2500 0.2500 0.5965(12) 0.066(5) Uani 1 2 d S . . 
B3 B 0.2500 0.2500 1.0752(14) 0.058(4) Uani 1 2 d S . . 
F5 F 0.2048(3) 0.2482(3) 0.5470(6) 0.156(4) Uani 1 1 d . . . 
F6 F 0.2495(3) 0.2154(2) 0.6573(8) 0.159(3) Uani 1 1 d . . . 
F7 F 0.2134(4) 0.2275(2) 1.0265(6) 0.177(4) Uani 1 1 d . . . 
F8 F 0.2264(4) 0.2798(3) 1.1302(9) 0.205(6) Uani 1 1 d . . . 
F1 F 0.2963(5) 0.0114(5) 0.7024(15) 0.115(6) Uani 0.657(18) 1 d P A 1 
F2 F 0.2206(8) -0.0342(5) 0.7033(13) 0.142(6) Uani 0.657(18) 1 d P A 1 
F3 F 0.2608(4) -0.0179(6) 0.5670(9) 0.118(6) Uani 0.657(18) 1 d P A 1 
F4 F 0.2148(4) 0.0342(3) 0.6496(13) 0.100(5) Uani 0.657(18) 1 d P A 1 
F1A F 0.2680(14) 0.0161(9) 0.7424(15) 0.105(9) Uani 0.343(18) 1 d P A 2 
F2A F 0.1974(7) -0.0112(15) 0.6895(18) 0.128(17) Uani 0.343(18) 1 d P A 2 
F3A F 0.2779(10) -0.0365(6) 0.637(2) 0.110(9) Uani 0.343(18) 1 d P A 2 
F4A F 0.2460(11) 0.0276(7) 0.5767(15) 0.092(10) Uani 0.343(18) 1 d P A 2 
 
loop_ 
 _atom_site_aniso_label 
 _atom_site_aniso_U_11 
 _atom_site_aniso_U_22 
 _atom_site_aniso_U_33 
 _atom_site_aniso_U_23 
 _atom_site_aniso_U_13 
 _atom_site_aniso_U_12 
S1 0.0695(13) 0.0389(12) 0.0593(14) -0.0042(10) 0.0072(15) 0.0007(12) 
S2 0.0829(16) 0.0483(14) 0.0835(18) 0.0018(13) -0.0146(18) -0.0015(12) 
O1 0.068(4) 0.057(4) 0.066(4) -0.016(3) 0.004(3) -0.007(3) 
O2 0.067(4) 0.053(4) 0.107(6) 0.007(4) 0.013(4) 0.020(3) 
O3 0.118(5) 0.060(4) 0.093(5) 0.026(4) 0.010(4) -0.010(4) 
O4 0.117(6) 0.055(5) 0.132(7) -0.010(4) 0.032(5) 0.014(4) 
N1 0.051(4) 0.034(4) 0.042(4) 0.000(3) -0.001(3) 0.002(3) 
N2 0.061(4) 0.036(4) 0.052(3) -0.020(5) 0.008(3) -0.006(3) 
N3 0.072(6) 0.060(5) 0.063(5) 0.007(4) 0.005(5) 0.002(4) 
N4 0.087(8) 0.044(5) 0.060(5) -0.003(4) 0.018(5) -0.014(5) 
N5 0.064(6) 0.102(8) 0.123(8) -0.005(6) 0.018(6) -0.004(5) 
N6 0.065(4) 0.047(4) 0.071(5) -0.003(4) -0.007(4) -0.006(4) 
N7 0.042(3) 0.043(5) 0.085(6) -0.004(5) -0.012(4) -0.005(3) 
N8 0.076(6) 0.073(6) 0.081(6) -0.010(4) -0.004(5) -0.018(4) 
N9 0.071(6) 0.064(6) 0.087(7) 0.002(4) -0.008(6) -0.003(5) 
N10 0.119(8) 0.101(8) 0.090(7) -0.012(5) -0.020(7) 0.015(7) 
C1 0.033(4) 0.052(6) 0.053(6) -0.003(4) 0.002(4) 0.004(4) 
C2 0.066(5) 0.043(6) 0.051(5) -0.002(4) -0.007(4) 0.001(5) 
C3 0.075(6) 0.045(6) 0.076(6) 0.017(5) 0.004(5) 0.004(5) 
C4 0.069(6) 0.066(6) 0.053(5) -0.007(4) -0.009(4) 0.000(4) 
C5 0.086(7) 0.097(8) 0.100(7) -0.008(6) -0.020(6) 0.030(6) 
C6 0.092(7) 0.056(6) 0.091(7) -0.014(5) 0.006(5) -0.016(5) 
C7 0.048(5) 0.050(7) 0.058(6) 0.020(5) -0.008(4) -0.004(4) 
C8 0.075(6) 0.052(6) 0.056(6) -0.010(5) 0.008(5) -0.001(5) 
C9 0.045(5) 0.077(8) 0.063(5) -0.015(5) -0.002(4) 0.013(4) 
C10 0.074(6) 0.074(6) 0.049(5) 0.006(4) -0.001(4) -0.012(5) 
C11 0.074(7) 0.135(11) 0.112(8) -0.011(7) 0.029(6) 0.022(7) 
C12 0.092(7) 0.052(6) 0.116(8) 0.009(6) -0.027(7) -0.016(5) 
B1 0.069(10) 0.059(9) 0.069(9) -0.004(7) 0.001(6) -0.005(7) 
B2 0.067(12) 0.084(13) 0.047(8) 0.000 0.000 0.052(9) 
B3 0.061(10) 0.035(9) 0.080(11) 0.000 0.000 0.010(8) 
F5 0.066(4) 0.282(11) 0.121(5) 0.081(7) -0.026(4) -0.014(5) 
F6 0.186(7) 0.071(5) 0.221(8) 0.009(6) -0.126(6) 0.006(4) 
F7 0.260(10) 0.115(6) 0.158(7) 0.012(5) -0.131(8) -0.072(6) 
F8 0.168(8) 0.141(7) 0.306(14) -0.106(8) 0.139(9) -0.062(5) 
F1 0.074(9) 0.118(10) 0.153(14) 0.051(10) -0.048(8) -0.006(7) 
F2 0.159(16) 0.096(10) 0.170(12) 0.023(8) 0.065(13) -0.030(9) 
F3 0.079(6) 0.208(18) 0.067(7) -0.028(9) 0.022(6) -0.008(7) 
F4 0.087(7) 0.076(7) 0.136(12) -0.034(7) -0.012(7) 0.018(6) 
F1A 0.15(2) 0.112(16) 0.054(12) -0.032(11) -0.036(14) -0.045(18) 
F2A 0.025(10) 0.27(5) 0.085(13) -0.01(2) 0.018(8) 0.026(15) 
F3A 0.151(18) 0.074(13) 0.106(19) -0.016(11) 0.051(15) 0.064(12) 
F4A 0.16(2) 0.058(13) 0.054(13) 0.010(10) -0.066(15) -0.001(12) 
 
_geom_special_details 
; 
 All esds (except the esd in the dihedral angle between two l.s. planes) 
 are estimated using the full covariance matrix.  The cell esds are taken 
 into account individually in the estimation of esds in distances, angles 
 and torsion angles; correlations between esds in cell parameters are only 
 used when they are defined by crystal symmetry.  An approximate (isotropic) 
 treatment of cell esds is used for estimating esds involving l.s. planes. 
; 
 
loop_ 
 _geom_bond_atom_site_label_1 
 _geom_bond_atom_site_label_2 
 _geom_bond_distance 
 _geom_bond_site_symmetry_2 
 _geom_bond_publ_flag 
S1 O2 1.400(6) . ? 
S1 O1 1.417(6) . ? 
S1 N3 1.636(7) . ? 
S1 N1 1.705(6) . ? 
S2 O3 1.398(7) . ? 
S2 O4 1.408(7) . ? 
S2 N8 1.670(8) . ? 
S2 N6 1.704(7) . ? 
N1 C1 1.355(9) . ? 
N1 C2 1.404(9) . ? 
N2 C1 1.341(10) . ? 
N2 C3 1.378(11) . ? 
N2 C6 1.463(10) . ? 
N3 N4 1.252(11) . ? 
N4 N5 1.118(10) . ? 
N6 C7 1.342(10) . ? 
N6 C8 1.378(10) . ? 
N7 C7 1.302(10) . ? 
N7 C9 1.397(12) . ? 
N7 C12 1.444(11) . ? 
N8 N9 1.210(11) . ? 
N9 N10 1.114(11) . ? 
C1 C4 1.444(11) . ? 
C2 C3 1.301(11) . ? 
C4 C5 1.537(12) . ? 
C7 C10 1.528(12) . ? 
C8 C9 1.338(11) . ? 
C10 C11 1.525(13) . ? 
B1 F3A 1.322(19) . ? 
B1 F1A 1.33(2) . ? 
B1 F2A 1.35(3) . ? 
B1 F4 1.350(15) . ? 
B1 F2 1.351(18) . ? 
B1 F1 1.357(16) . ? 
B1 F3 1.392(17) . ? 
B1 F4A 1.42(2) . ? 
B2 F5 1.294(10) . ? 
B2 F5 1.294(10) 14 ? 
B2 F6 1.333(12) . ? 
B2 F6 1.333(12) 14 ? 
B3 F7 1.303(11) 14 ? 
B3 F7 1.303(11) . ? 
B3 F8 1.305(12) 14 ? 
B3 F8 1.305(12) . ? 
 
loop_ 
 _geom_angle_atom_site_label_1 
 _geom_angle_atom_site_label_2 
 _geom_angle_atom_site_label_3 
 _geom_angle 
 _geom_angle_site_symmetry_1 
 _geom_angle_site_symmetry_3 
 _geom_angle_publ_flag 
O2 S1 O1 123.1(4) . . ? 
O2 S1 N3 105.7(4) . . ? 
O1 S1 N3 113.4(3) . . ? 
O2 S1 N1 106.8(3) . . ? 
O1 S1 N1 103.3(3) . . ? 
N3 S1 N1 102.3(3) . . ? 
O3 S2 O4 123.9(5) . . ? 
O3 S2 N8 115.3(4) . . ? 
O4 S2 N8 101.1(5) . . ? 
O3 S2 N6 103.9(4) . . ? 
O4 S2 N6 107.5(4) . . ? 
N8 S2 N6 103.3(4) . . ? 
C1 N1 C2 111.1(6) . . ? 
C1 N1 S1 125.1(5) . . ? 
C2 N1 S1 123.7(5) . . ? 
C1 N2 C3 108.3(6) . . ? 
C1 N2 C6 124.7(8) . . ? 
C3 N2 C6 127.0(8) . . ? 
N4 N3 S1 113.0(7) . . ? 
N5 N4 N3 173.8(10) . . ? 
C7 N6 C8 109.6(7) . . ? 
C7 N6 S2 125.8(6) . . ? 
C8 N6 S2 124.4(6) . . ? 
C7 N7 C9 109.6(7) . . ? 
C7 N7 C12 130.1(9) . . ? 
C9 N7 C12 120.1(8) . . ? 
N9 N8 S2 113.5(8) . . ? 
N10 N9 N8 174.6(11) . . ? 
N2 C1 N1 105.3(6) . . ? 
N2 C1 C4 126.4(8) . . ? 
N1 C1 C4 128.3(8) . . ? 
C3 C2 N1 103.9(7) . . ? 
C2 C3 N2 111.5(7) . . ? 
C1 C4 C5 113.8(8) . . ? 
N7 C7 N6 107.5(7) . . ? 
N7 C7 C10 123.3(8) . . ? 
N6 C7 C10 129.2(8) . . ? 
C9 C8 N6 106.4(8) . . ? 
C8 C9 N7 106.9(8) . . ? 
C11 C10 C7 110.9(8) . . ? 
F3A B1 F1A 108.3(19) . . ? 
F3A B1 F2A 113(2) . . ? 
F1A B1 F2A 99(2) . . ? 
F3A B1 F4 160.9(17) . . ? 
F1A B1 F4 89.7(17) . . ? 
F2A B1 F4 69.3(17) . . ? 
F3A B1 F2 77.0(13) . . ? 
F1A B1 F2 95.0(16) . . ? 
F2A B1 F2 39.7(14) . . ? 
F4 B1 F2 108.7(12) . . ? 
F3A B1 F1 81.8(15) . . ? 
F1A B1 F1 38.6(12) . . ? 
F2A B1 F1 136.3(17) . . ? 
F4 B1 F1 110.3(11) . . ? 
F2 B1 F1 116.3(15) . . ? 
F3A B1 F3 51.8(11) . . ? 
F1A B1 F3 146.6(19) . . ? 
F2A B1 F3 113.2(16) . . ? 
F4 B1 F3 109.3(13) . . ? 
F2 B1 F3 103.9(13) . . ? 
F1 B1 F3 108.0(13) . . ? 
F3A B1 F4A 109.5(16) . . ? 
F1A B1 F4A 117.1(17) . . ? 
F2A B1 F4A 109.9(18) . . ? 
F4 B1 F4A 54.4(12) . . ? 
F2 B1 F4A 141.4(15) . . ? 
F1 B1 F4A 102.4(13) . . ? 
F3 B1 F4A 60.8(12) . . ? 
F5 B2 F5 117.0(13) . 14 ? 
F5 B2 F6 106.6(5) . . ? 
F5 B2 F6 111.4(6) 14 . ? 
F5 B2 F6 111.4(6) . 14 ? 
F5 B2 F6 106.6(5) 14 14 ? 
F6 B2 F6 102.9(14) . 14 ? 
F7 B3 F7 118.7(16) 14 . ? 
F7 B3 F8 110.5(6) 14 14 ? 
F7 B3 F8 103.7(5) . 14 ? 
F7 B3 F8 103.7(5) 14 . ? 
F7 B3 F8 110.5(6) . . ? 
F8 B3 F8 109.7(19) 14 . ? 
 
_diffrn_measured_fraction_theta_max    1.000 
_diffrn_reflns_theta_full              21.00 
_diffrn_measured_fraction_theta_full   1.000 
_refine_diff_density_max    0.243 
_refine_diff_density_min   -0.211 
_refine_diff_density_rms    0.049 
