# Supplementary material
Source: MDPI journal article supplement (https://www.mdpi.com/2073-4352/2/1/118)
Supplement: s2 [file s2]

data_VA25
 
_audit_creation_date                    2008-05-07T14:37:33-00:00
_audit_creation_method                  'WinGX routine CIF_UPDATE'
_audit_conform_dict_name                cif_core.dic
_audit_conform_dict_version             2.3
_audit_conform_dict_location            ftp://ftp.iucr.org/pub/cif_core.dic
_publ_requested_category                FO
 
#----------------------------------------------------------------------------#
#                   CHEMICAL INFORMATION                                     #
#----------------------------------------------------------------------------#
 
_chemical_name_systematic
;
 ?
;
_chemical_formula_sum                   'C5 H7 N5 O2 S'
_chemical_formula_moiety                'C5 H7 N5 O2 S'
_chemical_formula_weight                201.22
 
#----------------------------------------------------------------------------#
#                   UNIT CELL INFORMATION                                    #
#----------------------------------------------------------------------------#
 
_symmetry_cell_setting                  monoclinic
_symmetry_space_group_name_H-M          'P 21/c'
_symmetry_space_group_name_Hall         '-P 2ybc'
_symmetry_Int_Tables_number             14
loop_
    _symmetry_equiv_pos_as_xyz
x,y,z
-x,1/2+y,1/2-z
-x,-y,-z
x,1/2-y,1/2+z
 
_cell_length_a                          8.0815(7)
_cell_length_b                          10.0732(9)
_cell_length_c                          10.7291(10)
_cell_angle_alpha                       90
_cell_angle_beta                        100.383(7)
_cell_angle_gamma                       90
_cell_volume                            859.11(13)
_cell_formula_units_Z                   4
_cell_measurement_temperature           173(2)
_cell_measurement_reflns_used           3583
_cell_measurement_theta_min             1.93
_cell_measurement_theta_max             25.70
 
#----------------------------------------------------------------------------#
#                   CRYSTAL INFORMATION                                      #
#----------------------------------------------------------------------------#
 
_exptl_crystal_description              'irregular fragment'
_exptl_crystal_colour                   colourless
_exptl_crystal_size_max                 0.41
_exptl_crystal_size_mid                 0.34
_exptl_crystal_size_min                 0.22
_exptl_crystal_density_diffrn           1.556
_exptl_crystal_density_method           'not measured'
_exptl_crystal_F_000                    416
_exptl_special_details
;
 ?
;
 
#----------------------------------------------------------------------------#
#                   ABSORPTION CORRECTION                                    #
#----------------------------------------------------------------------------#
 
_exptl_absorpt_coefficient_mu           0.35
_exptl_absorpt_correction_type          none
 
#----------------------------------------------------------------------------#
#                   DATA COLLECTION                                          #
#----------------------------------------------------------------------------#
 
_diffrn_source
                                'sealed X-ray tube, 12 x 0.4 mm long-fine focus'
_diffrn_ambient_temperature             173(2)
_diffrn_radiation_wavelength            0.71073
_diffrn_radiation_type                  'Mo K\a'
_diffrn_radiation_monochromator         'plane graphite'
_diffrn_detector                        'image plate (34 cm diameter)'
_diffrn_detector_area_resol_mean        6.67
_diffrn_measurement_device              '2-circle goniometer'
_diffrn_measurement_device_type         'STOE IPDS 2'
_diffrn_measurement_method              'rotation method'
_diffrn_reflns_av_R_equivalents         0.0502
_diffrn_reflns_av_unetI/netI            0.0429
_diffrn_reflns_number                   4991
_diffrn_reflns_limit_h_min              -9
_diffrn_reflns_limit_h_max              9
_diffrn_reflns_limit_k_min              -12
_diffrn_reflns_limit_k_max              12
_diffrn_reflns_limit_l_min              -12
_diffrn_reflns_limit_l_max              12
_diffrn_reflns_theta_min                1.93
_diffrn_reflns_theta_max                25.70
_diffrn_reflns_theta_full               25.27
_diffrn_measured_fraction_theta_full
                                        0.999
_diffrn_measured_fraction_theta_max
                                        0.999
_reflns_number_total              1562
_reflns_number_gt                 1211
_reflns_threshold_expression      >2sigma(I)

 
#----------------------------------------------------------------------------#
#                   COMPUTER PROGRAMS USED                                   #
#----------------------------------------------------------------------------#
 
_computing_data_collection              'STOE X-AREA'
_computing_cell_refinement              'STOE X-AREA'
_computing_data_reduction               'STOE X-RED'
_computing_structure_solution           'SIR2002 (Burla et al., 2003)'
_computing_structure_refinement         'SHELXL-97 (Sheldrick, 1997)'
 
#----------------------------------------------------------------------------#
#                   REFINEMENT INFORMATION                                   #
#----------------------------------------------------------------------------#
 
_refine_special_details
;
 Refinement of F^2^ against ALL reflections.  The weighted R-factor wR and
 goodness of fit S are based on F^2^, conventional R-factors R are based
 on F, with F set to zero for negative F^2^. The threshold expression of
 F^2^ > 2sigma(F^2^) is used only for calculating R-factors(gt) etc. and is
 not relevant to the choice of reflections for refinement.  R-factors based
 on F^2^ are statistically about twice as large as those based on F, and R-
 factors based on ALL data will be even larger.
;
_refine_ls_structure_factor_coef        Fsqd
_refine_ls_matrix_type                  full
_refine_ls_weighting_scheme             calc
_refine_ls_weighting_details
         'calc w=1/[\s^2^(Fo^2^)+(0.0550P)^2^+0.0000P] where P=(Fo^2^+2Fc^2^)/3'
_atom_sites_solution_primary            direct
_atom_sites_solution_secondary          difmap
_atom_sites_solution_hydrogens          geom
_refine_ls_hydrogen_treatment           constr
_refine_ls_extinction_method            SHELXL
_refine_ls_extinction_expression
                                    Fc^*^=kFc[1+0.001xFc^2^\l^3^/sin(2\q)]^-1/4^
_refine_ls_extinction_coef              0.010(3)
_refine_ls_number_reflns                1562
_refine_ls_number_parameters            120
_refine_ls_number_restraints            0
_refine_ls_R_factor_all                 0.0536
_refine_ls_R_factor_gt                  0.0377
_refine_ls_wR_factor_ref                0.0943
_refine_ls_wR_factor_gt                 0.0893
_refine_ls_goodness_of_fit_ref          1.005
_refine_ls_restrained_S_all             1.005
_refine_ls_shift/su_max                 0
_refine_ls_shift/su_mean                0
_refine_diff_density_max                0.273
_refine_diff_density_min                -0.316
_refine_diff_density_rms                0.05
 
#----------------------------------------------------------------------------#
#                   ATOMIC TYPES, COORDINATES AND THERMAL PARAMETERS         #
#----------------------------------------------------------------------------#
 
loop_
    _atom_type_symbol
    _atom_type_description
    _atom_type_scat_dispersion_real
    _atom_type_scat_dispersion_imag
    _atom_type_scat_source
C C 0.0033 0.0016 'International Tables Vol C Tables 4.2.6.8 and 6.1.1.4'
H H 0 0 'International Tables Vol C Tables 4.2.6.8 and 6.1.1.4'
N N 0.0061 0.0033 'International Tables Vol C Tables 4.2.6.8 and 6.1.1.4'
O O 0.0106 0.006 'International Tables Vol C Tables 4.2.6.8 and 6.1.1.4'
S S 0.1246 0.1234 'International Tables Vol C Tables 4.2.6.8 and 6.1.1.4'
 
loop_
    _atom_site_label
    _atom_site_type_symbol
    _atom_site_fract_x
    _atom_site_fract_y
    _atom_site_fract_z
    _atom_site_U_iso_or_equiv
    _atom_site_adp_type
    _atom_site_occupancy
    _atom_site_symmetry_multiplicity
    _atom_site_calc_flag
    _atom_site_refinement_flags
    _atom_site_disorder_assembly
    _atom_site_disorder_group
S1 S 0.36300(7) 0.09145(6) 0.72614(5) 0.0312(2) Uani 1 1 d . . .
O1 O 0.50113(19) 0.00370(18) 0.74128(18) 0.0446(5) Uani 1 1 d . . .
O2 O 0.3378(2) 0.18180(17) 0.82242(15) 0.0381(4) Uani 1 1 d . . .
N1 N 0.1883(2) 0.00266(18) 0.69374(17) 0.0283(4) Uani 1 1 d . . .
N3 N 0.3734(2) 0.1712(2) 0.59269(18) 0.0363(5) Uani 1 1 d . . .
N2 N -0.0007(2) -0.14333(19) 0.60350(18) 0.0323(5) Uani 1 1 d . . .
N4 N 0.2842(3) 0.2761(2) 0.57996(18) 0.0342(5) Uani 1 1 d . . .
N5 N 0.2125(3) 0.3700(2) 0.5589(2) 0.0444(6) Uani 1 1 d . . .
C1 C 0.1561(3) -0.1084(2) 0.6135(2) 0.0285(5) Uani 1 1 d . . .
C3 C -0.0742(3) -0.0540(2) 0.6759(2) 0.0326(5) Uani 1 1 d . . .
H3 H -0.189 -0.0567 0.6848 0.039 Uiso 1 1 calc R . .
C2 C 0.0366(3) 0.0362(2) 0.7316(2) 0.0311(5) Uani 1 1 d . . .
H2 H 0.0167 0.1074 0.7851 0.037 Uiso 1 1 calc R . .
C4 C 0.2869(3) -0.1715(3) 0.5522(2) 0.0374(6) Uani 1 1 d . . .
H4A H 0.3823 -0.1991 0.6185 0.045 Uiso 1 1 calc R . .
H4B H 0.3295 -0.1055 0.4974 0.045 Uiso 1 1 calc R . .
C5 C 0.2215(3) -0.2915(3) 0.4730(3) 0.0476(7) Uani 1 1 d . . .
H5A H 0.1794 -0.3575 0.5268 0.071 Uiso 1 1 calc R . .
H5B H 0.3127 -0.3304 0.436 0.071 Uiso 1 1 calc R . .
H5C H 0.13 -0.2642 0.405 0.071 Uiso 1 1 calc R . .
 
loop_
    _atom_site_aniso_label
    _atom_site_aniso_U_11
    _atom_site_aniso_U_22
    _atom_site_aniso_U_33
    _atom_site_aniso_U_23
    _atom_site_aniso_U_13
    _atom_site_aniso_U_12
S1 0.0251(3) 0.0380(4) 0.0288(3) -0.0034(3) 0.0002(2) -0.0019(2)
O1 0.0267(8) 0.0499(11) 0.0532(11) -0.0039(9) -0.0038(7) 0.0045(8)
O2 0.0391(9) 0.0458(10) 0.0283(8) -0.0094(8) 0.0031(7) -0.0062(8)
N1 0.0266(9) 0.0323(11) 0.0251(9) -0.0011(8) 0.0020(7) 0.0005(8)
N3 0.0341(11) 0.0406(12) 0.0365(12) -0.0014(10) 0.0119(9) -0.0020(9)
N2 0.0295(10) 0.0336(11) 0.0325(11) 0.0006(9) 0.0023(8) -0.0021(8)
N4 0.0384(11) 0.0391(13) 0.0250(10) -0.0037(9) 0.0056(8) -0.0105(10)
N5 0.0566(14) 0.0401(14) 0.0349(12) -0.0009(10) 0.0041(10) -0.0025(11)
C1 0.0303(11) 0.0269(12) 0.0268(11) 0.0009(9) 0.0009(9) 0.0008(9)
C3 0.0271(11) 0.0401(14) 0.0305(12) 0.0040(10) 0.0051(9) 0.0001(10)
C2 0.0299(11) 0.0368(13) 0.0273(12) 0.0018(10) 0.0068(9) 0.0040(10)
C4 0.0309(12) 0.0396(14) 0.0408(13) -0.0068(12) 0.0037(10) 0.0063(10)
C5 0.0490(15) 0.0388(15) 0.0555(17) -0.0123(13) 0.0106(13) 0.0025(12)
 
 
#----------------------------------------------------------------------------#
#                   MOLECULAR GEOMETRY                                       #
#----------------------------------------------------------------------------#
 
_geom_special_details
;
 All esds (except the esd in the dihedral angle between two l.s. planes)
 are estimated using the full covariance matrix.  The cell esds are taken
 into account individually in the estimation of esds in distances, angles
 and torsion angles; correlations between esds in cell parameters are only
 used when they are defined by crystal symmetry.  An approximate (isotropic)
 treatment of cell esds is used for estimating esds involving l.s. planes.
;
loop_
    _geom_bond_atom_site_label_1
    _geom_bond_atom_site_label_2
    _geom_bond_distance
    _geom_bond_site_symmetry_2
    _geom_bond_publ_flag
S1 O1 1.4101(17) . ?
S1 O2 1.4188(17) . ?
S1 N1 1.6543(18) . ?
S1 N3 1.657(2) . ?
N1 C2 1.401(3) . ?
N1 C1 1.407(3) . ?
N3 N4 1.272(3) . ?
N2 C1 1.301(3) . ?
N2 C3 1.390(3) . ?
N4 N5 1.111(3) . ?
C1 C4 1.485(3) . ?
C3 C2 1.339(3) . ?
C3 H3 0.95 . ?
C2 H2 0.95 . ?
C4 C5 1.517(4) . ?
C4 H4A 0.99 . ?
C4 H4B 0.99 . ?
C5 H5A 0.98 . ?
C5 H5B 0.98 . ?
C5 H5C 0.98 . ?
 
loop_
    _geom_angle_atom_site_label_1
    _geom_angle_atom_site_label_2
    _geom_angle_atom_site_label_3
    _geom_angle
    _geom_angle_site_symmetry_1
    _geom_angle_site_symmetry_3
    _geom_angle_publ_flag
O1 S1 O2 122.21(10) . . ?
O1 S1 N1 108.26(10) . . ?
O2 S1 N1 105.70(10) . . ?
O1 S1 N3 103.95(11) . . ?
O2 S1 N3 110.76(11) . . ?
N1 S1 N3 104.75(10) . . ?
C2 N1 C1 107.11(18) . . ?
C2 N1 S1 124.53(16) . . ?
C1 N1 S1 127.98(15) . . ?
N4 N3 S1 112.30(15) . . ?
C1 N2 C3 106.65(19) . . ?
N5 N4 N3 173.4(2) . . ?
N2 C1 N1 109.63(19) . . ?
N2 C1 C4 127.5(2) . . ?
N1 C1 C4 122.9(2) . . ?
C2 C3 N2 111.8(2) . . ?
C2 C3 H3 124.1 . . ?
N2 C3 H3 124.1 . . ?
C3 C2 N1 104.8(2) . . ?
C3 C2 H2 127.6 . . ?
N1 C2 H2 127.6 . . ?
C1 C4 C5 112.6(2) . . ?
C1 C4 H4A 109.1 . . ?
C5 C4 H4A 109.1 . . ?
C1 C4 H4B 109.1 . . ?
C5 C4 H4B 109.1 . . ?
H4A C4 H4B 107.8 . . ?
C4 C5 H5A 109.5 . . ?
C4 C5 H5B 109.5 . . ?
H5A C5 H5B 109.5 . . ?
C4 C5 H5C 109.5 . . ?
H5A C5 H5C 109.5 . . ?
H5B C5 H5C 109.5 . . ?
 
